# Supplementary material for: rRNA methylation by Spb1 regulates the GTPase activity of Nog2 during 60S ribosomal subunit assembly
Source: PubMed Central journal article supplement (PMC9981671; doi:10.1038/s41467-023-36867-5), 2023-03-02
Supplement: 41467_2023_36867_MOESM1_ESM.pdf [file 41467_2023_36867_MOESM1_ESM.pdf]

# Supplementary Information

## **rRNA methylation by Spb1 regulates the GTPase activity of Nog2 during 60S ribosomal subunit assembly**

Kamil Sekulski<sup>†</sup>, Victor Emmanuel Cruz<sup>†</sup>, Christine S. Weirich and Jan P. Erzberger<sup>1\*</sup>

Department of Biophysics, UT Southwestern Medical Center; 5323 Harry Hines Blvd., ND10.104B, Dallas, TX 75390-8816, USA

\*Corresponding author. Email: [jan.erzberger@utsouthwestern.edu](mailto:jan.erzberger@utsouthwestern.edu)

<sup>†</sup> These authors contributed equally

**Supplementary Information Table 1 | Cryo-EM data collection, refinement and validation statistics**

**Supplementary Information Table 2 | Yeast strains used in this study**

**Supplementary Information Table 3 | Plasmids used in this study**

**Supplementary Information Figure 1 | Purified Nog2·Tif6 pre-ribosomes used for cryo-EM analysis.**

**Supplementary Information Figure 2 | Micrographs, 2D classes, Fourier shell correlation (FSC) curves and ResMap plots of maps from *SPB1* (panels a-e) or *spb1*<sup>DJ2A/E769K</sup> (panels f-h) strains.**

**Supplementary Information Figure 3 | Micrographs, 2D classes, Fourier shell correlation (FSC) curves and ResMap plots of maps of Nog2<sup>pre</sup> and Nog2<sup>post</sup> (panels a-e) and Nog2<sup>pre</sup>+Alf4<sup>-</sup> (panels f-h) purified from the *spb1*<sup>DJ2A</sup> strain.**

**Supplementary Information Figure 4 | Cryo-EM data processing, 3D-classification and particle sorting scheme.**

**Supplementary Information Figure 5 | Representative Cryo-EM map densities for the wild-type Nog2<sup>pre</sup> sample.**

**Supplementary Information Figure 6 | Map interpretation.**

**Supplementary Information Figure 7 | Cryo-EM data processing, 3D-classification and particle sorting scheme for Nog2·Tif6 intermediates.**

**Supplementary Information Figure 8 | Overexpression of *NMD3* or *SPB1-MTD* does not rescue growth of *spb1*<sup>DJ2A</sup> and location of *spb1*<sup>DJ2A</sup> suppressor mutants in the C-terminal domain of Spb1.**

## Supplementary Information Table 1 | Cryo-EM data collection, refinement and validation statistics

|                                                     | Nog2 <sup>pre</sup><br><i>SPB1</i><br>( <a href="#">emdb-26651</a> )<br>( <a href="#">pdb 7UOQ</a> ) | Nog2 <sup>pre</sup><br>5S rRNP<br><i>SPB1</i><br>( <a href="#">emdb-26689</a> ) | Nog2 <sup>pre</sup><br><i>spb1<sup>DS2.4</sup></i><br>( <a href="#">emdb-26703</a> )<br>( <a href="#">pdb 7UOZ</a> ) | Nog2 <sup>post</sup><br><i>spb1<sup>DS2.4</sup></i><br>( <a href="#">emdb-26799</a> )<br>( <a href="#">pdb 7UUI</a> ) | Nog2 <sup>pre</sup> -AlF <sub>4</sub> <sup>-</sup><br><i>spb1<sup>DS2.4</sup></i><br>( <a href="#">emdb-26686</a> )<br>( <a href="#">pdb 7UQB</a> ) | Nog2 <sup>pre</sup><br><i>spb1<sup>DS2.4/E769E</sup></i><br>( <a href="#">emdb-26941</a> )<br>( <a href="#">pdb 7V08</a> ) |
|-----------------------------------------------------|------------------------------------------------------------------------------------------------------|---------------------------------------------------------------------------------|----------------------------------------------------------------------------------------------------------------------|-----------------------------------------------------------------------------------------------------------------------|-----------------------------------------------------------------------------------------------------------------------------------------------------|----------------------------------------------------------------------------------------------------------------------------|
| <b>Data collection and processing</b>               |                                                                                                      |                                                                                 |                                                                                                                      |                                                                                                                       |                                                                                                                                                     |                                                                                                                            |
| Magnification                                       | 81,000x                                                                                              | 81,000x                                                                         | 81,000x                                                                                                              | 81,000x                                                                                                               | 81,000x                                                                                                                                             | 81,000x                                                                                                                    |
| Voltage (kV)                                        | 300                                                                                                  | 300                                                                             | 300                                                                                                                  | 300                                                                                                                   | 300                                                                                                                                                 | 300                                                                                                                        |
| Electron exposure (e <sup>-</sup> /Å <sup>2</sup> ) | 56                                                                                                   | 56                                                                              | 56                                                                                                                   | 56                                                                                                                    | 50                                                                                                                                                  | 56                                                                                                                         |
| Defocus range (μm)                                  | -0.9 – (-2.2)                                                                                        | -0.9 – (-2.2)                                                                   | -0.9 – (-2.2)                                                                                                        | -0.9 – (-2.2)                                                                                                         | -0.9 – (-2.2)                                                                                                                                       | -0.9 – (-2.2)                                                                                                              |
| Pixel size (Å)                                      | 1.08                                                                                                 | 1.08                                                                            | 1.08                                                                                                                 | 1.08                                                                                                                  | 1.07                                                                                                                                                | 1.08                                                                                                                       |
| Symmetry imposed                                    | C1                                                                                                   | C1                                                                              | C1                                                                                                                   | C1                                                                                                                    | C1                                                                                                                                                  | C1                                                                                                                         |
| Initial particle images (no.)                       | 1,639,317                                                                                            | 1,639,317                                                                       | 905,023                                                                                                              | 905,023                                                                                                               | 716,018                                                                                                                                             | 1,207,583                                                                                                                  |
| Final particle images (no.)                         | 1,159,206                                                                                            | 1,035,794                                                                       | 328,470                                                                                                              | 50,091                                                                                                                | 417,994                                                                                                                                             | 320,145                                                                                                                    |
| Map resolution (Å)                                  | 2.34                                                                                                 | 2.63                                                                            | 2.44                                                                                                                 | 2.90                                                                                                                  | 2.38                                                                                                                                                | 2.36                                                                                                                       |
| FSC threshold                                       | 0.143                                                                                                | 0.143                                                                           | 0.143                                                                                                                | 0.143                                                                                                                 | 0.143                                                                                                                                               | 0.143                                                                                                                      |
| Map resolution range (Å)                            | 2.2 – 10                                                                                             | 2.2 – 10                                                                        | 2.2 – 10                                                                                                             | 2.2 – 10                                                                                                              | 2.2 – 10                                                                                                                                            | 2.2 – 10                                                                                                                   |
| <b>Refinement</b>                                   |                                                                                                      |                                                                                 |                                                                                                                      |                                                                                                                       |                                                                                                                                                     |                                                                                                                            |
| Initial model used (PDB code)                       | <a href="#">3JCT</a>                                                                                 |                                                                                 | <a href="#">3JCT</a>                                                                                                 | <a href="#">6YLH</a>                                                                                                  | <a href="#">3JCT</a>                                                                                                                                | <a href="#">3JCT</a>                                                                                                       |
| Model resolution (Å)                                | 2.52                                                                                                 |                                                                                 | 2.60                                                                                                                 | 3.33                                                                                                                  | 2.53                                                                                                                                                | 2.48                                                                                                                       |
| FSC threshold                                       | 0.5                                                                                                  |                                                                                 | 0.5                                                                                                                  | 0.5                                                                                                                   | 0.5                                                                                                                                                 | 0.5                                                                                                                        |
| Map sharpening B factor (Å <sup>2</sup> )           | 79.52                                                                                                |                                                                                 | 82.93                                                                                                                | 87.17                                                                                                                 | 70.61                                                                                                                                               | 61.93                                                                                                                      |
| Model composition                                   |                                                                                                      |                                                                                 |                                                                                                                      |                                                                                                                       |                                                                                                                                                     |                                                                                                                            |
| Non-hydrogen atoms                                  | 157949                                                                                               |                                                                                 | 157839                                                                                                               | 3672                                                                                                                  | 157949                                                                                                                                              | 157849                                                                                                                     |
| Protein residues                                    |                                                                                                      |                                                                                 |                                                                                                                      |                                                                                                                       |                                                                                                                                                     |                                                                                                                            |
| Nucleotides                                         | 10806                                                                                                |                                                                                 | 10806                                                                                                                | 452                                                                                                                   | 10806                                                                                                                                               | 10806                                                                                                                      |
|                                                     | 3329                                                                                                 |                                                                                 | 3325                                                                                                                 | 1                                                                                                                     | 3330                                                                                                                                                | 3325                                                                                                                       |
| B factors (Å <sup>2</sup> )                         |                                                                                                      |                                                                                 |                                                                                                                      |                                                                                                                       |                                                                                                                                                     |                                                                                                                            |
| Protein                                             | 22.13                                                                                                |                                                                                 | 19.42                                                                                                                | 21.70                                                                                                                 | 19.17                                                                                                                                               | 21.39                                                                                                                      |
| Nucleotides                                         | 23.34                                                                                                |                                                                                 | 21.14                                                                                                                | 17.29                                                                                                                 | 20.90                                                                                                                                               | 32.00                                                                                                                      |
| Ligand                                              | 15.98                                                                                                |                                                                                 | 11.19                                                                                                                | 12.13                                                                                                                 | 12.04                                                                                                                                               | 12.91                                                                                                                      |
| Waters                                              | 16.23                                                                                                |                                                                                 | 11.01                                                                                                                |                                                                                                                       | 10.89                                                                                                                                               | 8.39                                                                                                                       |
| R.m.s. deviations                                   |                                                                                                      |                                                                                 |                                                                                                                      |                                                                                                                       |                                                                                                                                                     |                                                                                                                            |
| Bond lengths (Å)                                    | 0.002                                                                                                |                                                                                 | 0.002                                                                                                                | 0.002                                                                                                                 | 0.003                                                                                                                                               | 0.005                                                                                                                      |
| Bond angles (°)                                     | 0.563                                                                                                |                                                                                 | 0.536                                                                                                                | 0.504                                                                                                                 | 0.576                                                                                                                                               | 0.729                                                                                                                      |
| Validation                                          |                                                                                                      |                                                                                 |                                                                                                                      |                                                                                                                       |                                                                                                                                                     |                                                                                                                            |
| MolProbity score                                    | 1.31                                                                                                 |                                                                                 | 1.23                                                                                                                 | 1.13                                                                                                                  | 1.28                                                                                                                                                | 1.29                                                                                                                       |
| Clashscore                                          | 3.41                                                                                                 |                                                                                 | 3.67                                                                                                                 | 3.38                                                                                                                  | 4.24                                                                                                                                                | 4.08                                                                                                                       |
| Poor rotamers (%)                                   | 0.2                                                                                                  |                                                                                 | 0.33                                                                                                                 | 0                                                                                                                     | 0.43                                                                                                                                                | 0.55                                                                                                                       |
| Ramachandran plot                                   |                                                                                                      |                                                                                 |                                                                                                                      |                                                                                                                       |                                                                                                                                                     |                                                                                                                            |
| Favored (%)                                         | 97.56                                                                                                |                                                                                 | 97.65                                                                                                                | 98.65                                                                                                                 | 97.68                                                                                                                                               | 97.50                                                                                                                      |
| Allowed (%)                                         | 2.44                                                                                                 |                                                                                 | 2.35                                                                                                                 | 1.35                                                                                                                  | 2.32                                                                                                                                                | 2.50                                                                                                                       |
| Disallowed (%)                                      | 0                                                                                                    |                                                                                 | 0                                                                                                                    | 0                                                                                                                     | 0                                                                                                                                                   | 0                                                                                                                          |

Supplementary Information Table 2 | Yeast strains used in this study

| Strain  | Relevant Genotype                                                                                                                                                                                 | Source        |
|---------|---------------------------------------------------------------------------------------------------------------------------------------------------------------------------------------------------|---------------|
| BY4741  | <i>MATa; his3Δ1; leu2Δ0; met15Δ0; ura3Δ0</i>                                                                                                                                                      | <sup>45</sup> |
| YJE608  | <i>MATa; his3Δ1; leu2Δ0; met15Δ0; ura3Δ0; trp1Δ::LexA-ED-AD::TRP1; ura3Δ0::P<sub>minCYC1</sub>-NOG2-Myc-TEV-2xStrep::URA3; TIF6-3xFLAG-3C-2xProtA::Hph</i>                                        | This study    |
| YJE735  | <i>MATa; his3Δ1; leu2Δ0; met15Δ0; ura3Δ0; trp1Δ::LexA-ED-AD::TRP1; ura3Δ0::P<sub>minCYC1</sub>-NOG2-Myc-TEV-2xStrep::URA3; TIF6-3xFLAG-3C-2xProtA::Hph; spb1<sup>D52A</sup>::TEF-NrsR-T9</i>      | This study    |
| YJE743  | <i>MATa his3Δ1 leu2Δ0 met15Δ0 ura3Δ0 trp1Δ::LexA-ED-AD::TRP1 SPB1::NrsR TEF-NrsR-T9</i>                                                                                                           | This study    |
| YJE744  | <i>MATa his3Δ1 leu2Δ0 met15Δ0 ura3Δ0 trp1Δ::LexA-ED-AD::TRP1 spb1<sup>D52A</sup>::NrsR TEF-NrsR-T9</i>                                                                                            | This study    |
| YJE869  | <i>MATa his3Δ1 leu2Δ0 met15Δ0 ura3Δ0 trp1Δ::LexA-ED-AD::TRP1 spb1<sup>D52AE769K</sup>::NrsR TEF-NrsR-T9</i>                                                                                       | This study    |
| YJE923  | <i>MATa; his3Δ1; leu2Δ0; met15Δ0; ura3Δ0; trp1Δ::LexA-ED-AD::TRP1; ura3Δ0::P<sub>minCYC1</sub>-NOG2-Myc-TEV-2xStrep::URA3; TIF6-3xFLAG-3C-2xProtA::HYG; spb1<sup>D52AE769K</sup>::TEF-NrsR-T9</i> | This study    |
| YJE1133 | <i>MATa; his3Δ1; leu2Δ0; ura3Δ0; spb1Δ::HygR, pRS316-SPB1</i>                                                                                                                                     | This study    |
| YJE1221 | <i>MATa; his3Δ1; leu2Δ0; ura3Δ0; spb1Δ::HygR, pRS313-SPB1</i>                                                                                                                                     | This study    |
| YJE1222 | <i>MATa; his3Δ1; leu2Δ0; ura3Δ0; spb1Δ::HygR, pRS313-spb1<sup>D52A</sup></i>                                                                                                                      | This study    |
| YJE1223 | <i>MATa; his3Δ1; leu2Δ0; ura3Δ0; spb1Δ::HygR, pRS313-spb1<sup>D52A/E769K</sup></i>                                                                                                                | This study    |
| YJE1224 | <i>MATa; his3Δ1; leu2Δ0; ura3Δ0; spb1Δ::HygR, pRS313-spb1<sup>D52A/K767N</sup></i>                                                                                                                | This study    |
| YJE1225 | <i>MATa; his3Δ1; leu2Δ0; ura3Δ0; spb1Δ::HygR, pRS313-spb1<sup>E769K</sup></i>                                                                                                                     | This study    |
| YJE1226 | <i>MATa; his3Δ1; leu2Δ0; ura3Δ0; spb1Δ::HygR, pRS313-spb1<sup>K767N</sup></i>                                                                                                                     | This study    |

### Supplementary Information Table 3 | Plasmids used in this study

| Plasmid name    | Description                                               | Source     |
|-----------------|-----------------------------------------------------------|------------|
| pRS246-GAL      | Yeast 2 $\mu$ plasmid containing the GAL1 promoter (URA3) | Addgene    |
| pJE649          | pFA6a-3xFLAG-3C-6GLY-2xPrtA-HygMX                         | This study |
| pJE1047         | pRS426-GAL-NMD3                                           | This study |
| pJE1049         | pRS426-GAL-NOG2                                           | This study |
| pJE1051         | pRS426-GAL- <i>nog2</i> <sup>G369A</sup>                  | This study |
| pJE1069         | pRS426-GAL- <i>SPB1</i> - <i>MTD-NoLS</i>                 | This study |
| pJE1071         | pRS426-GAL- <i>spb1</i> <sup>D52A</sup> - <i>MTD-NoLS</i> | This study |
| pJE1095         | pRS316- <i>SPB1</i>                                       | This study |
| pJE1105         | pRS313- <i>spb1</i> <sup>D52A/E769K</sup>                 | This study |
| pJE1106         | pRS313- <i>spb1</i> <sup>D52A/K767N</sup>                 | This study |
| pJE1107         | pRS313- <i>SPB1</i>                                       | This study |
| pJE1116         | pRS313- <i>spb1</i> <sup>E769K</sup>                      | This study |
| pJE1118         | pRS313- <i>spb1</i> <sup>K767N</sup>                      | This study |
| pJE1142         | pRS313- <i>spb1</i> <sup>D52A</sup>                       | This study |
| pRS316-uL18-GFP | Yeast CEN plasmid expressing uL18-GFP                     | 28         |
| pRS316-uS5-GFP  | Yeast CEN plasmid expressing uS5-GFP                      | 28         |

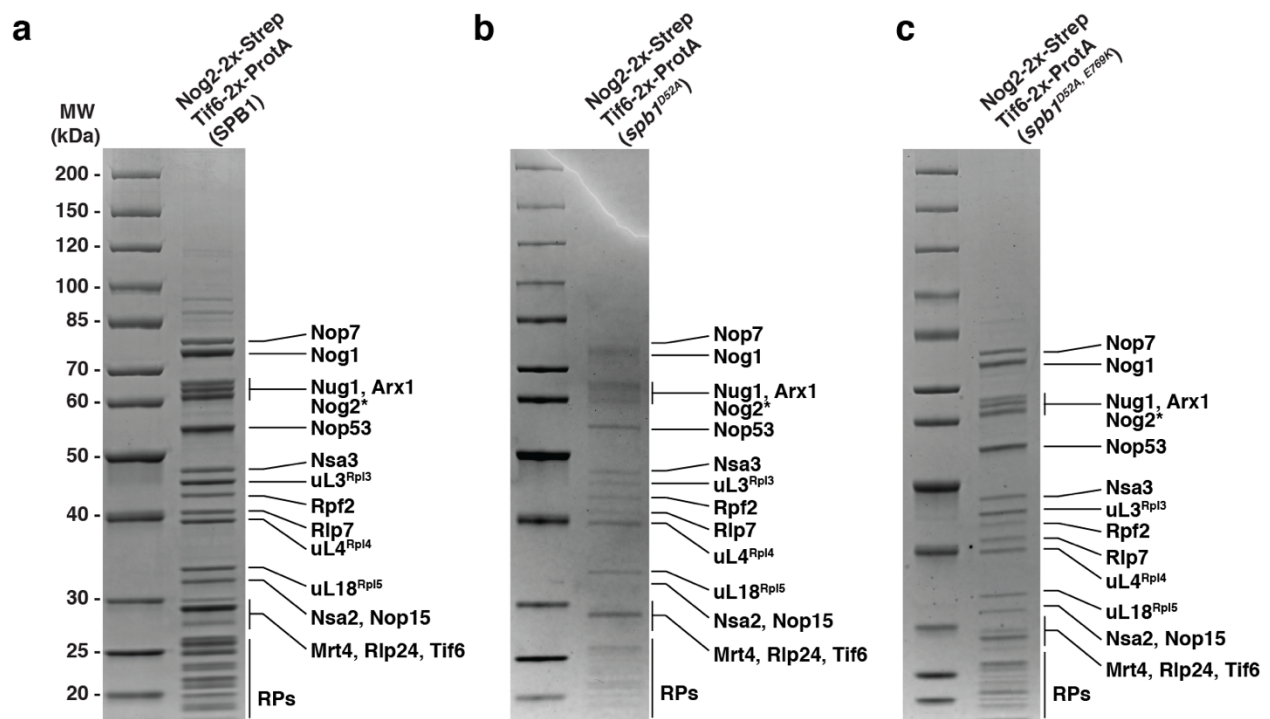

**Supplementary Information Figure 1 | Purified Nog2-Tif6 pre-ribosomes used for cryo-EM analysis.** **a**, Coomassie-stained 4 – 20% SDS-PAGE gel of the sample purified from the wildtype *SPB1* strain. **b**, Gel of sample derived from the *spb1*<sup>D52A</sup> strain. **c**, Gel of sample derived from the *spb1*<sup>D52A/E769K</sup> strain. Protein identification was based on molecular weight, ambiguous bands were identified using mass spectrometry.

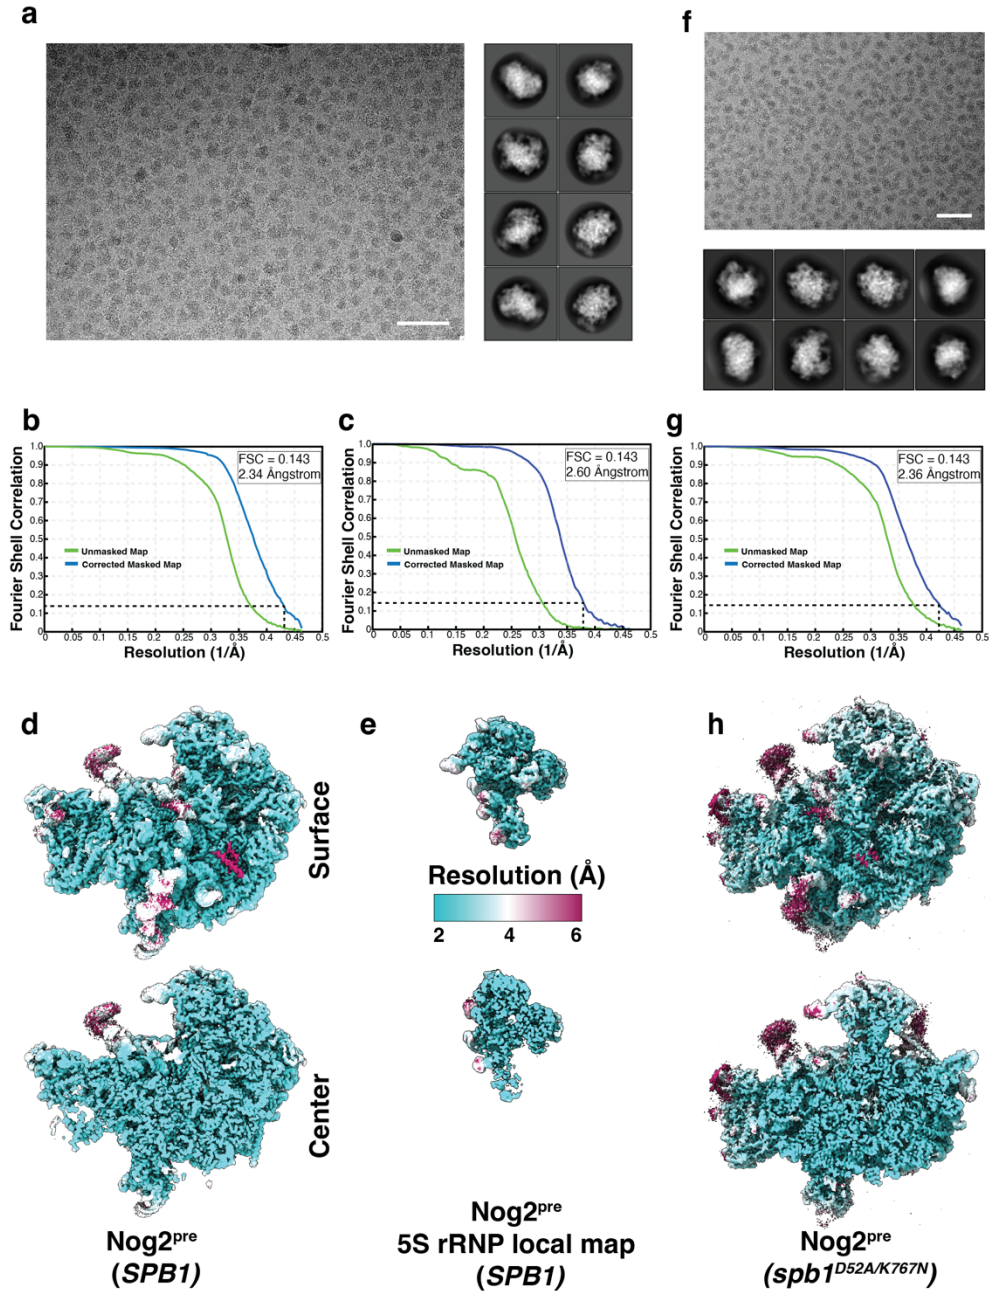

Supplementary Information Figure 2 | Micrographs, 2D classes, Fourier shell correlation (FSC) curves and ResMap plots of maps from *SPB1* (panels a-e) or *spb1<sup>DJ2A/E769K</sup>* (panels f-h) strains. **a**, Representative micrograph and 2D classes. Scale bar represents 50  $\mu\text{m}$ . **b**, Fourier shell correlation of unmasked and masked maps with an overall resolution of 2.34  $\text{\AA}$ . **c**, Fourier shell correlation of unmasked and masked 5S rRNP local map with an overall resolution of 2.60  $\text{\AA}$ . **d**, Overall map (surface and sliced) colored according to local resolution estimates. **e**, Resolution distribution of local 5S RNP map. **f**, Representative micrograph and 2D classes. Scale bar represents 50  $\mu\text{m}$ . **g**, Fourier shell correlation of unmasked and masked maps with an overall resolution of 2.36  $\text{\AA}$ . **h**, Overall pre-rotation map colored according to local resolution estimates.



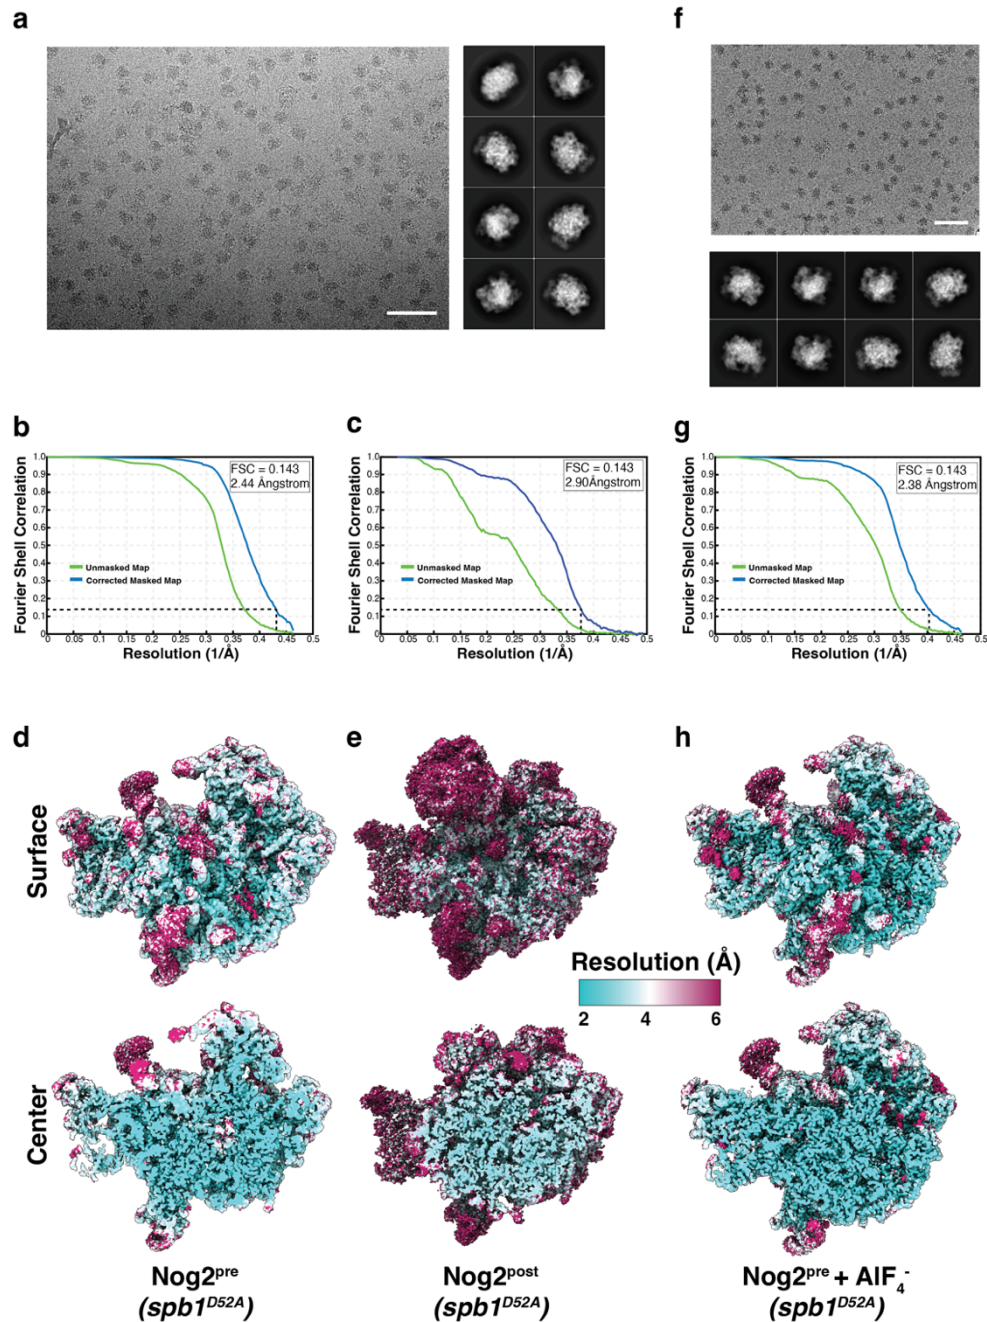

**Supplementary Information Figure 3 | Micrographs, 2D classes, Fourier shell correlation (FSC) curves and ResMap plots of maps of  $\text{Nog2}^{\text{pre}}$  and  $\text{Nog2}^{\text{post}}$  (panels a-e) and  $\text{Nog2}^{\text{pre}} + \text{AIF}_4^-$  (panels f-h) purified from the  $\text{spb1}^{\text{DJ2A}}$  strain. a, Representative micrograph and 2D classes. Scale bar represents 50  $\mu\text{m}$ . b, Fourier shell correlation of unmasked and masked  $\text{Nog2}^{\text{pre}}$  map with an overall resolution of 2.44 Å. c, Fourier shell correlation of unmasked and masked  $\text{Nog2}^{\text{post}}$  map with an overall resolution of 2.90 Å. d, Overall  $\text{Nog2}^{\text{pre}}$  map colored (surface and slice) according to local resolution estimates. e, Overall  $\text{Nog2}^{\text{post}}$  map is shown and colored according to local resolution estimates. f, Representative micrograph and 2D classes. Scale bar represents 50  $\mu\text{m}$ . g, Fourier shell correlation of unmasked and masked  $\text{Nog2}^{\text{pre}}$  map with an overall resolution of 2.38 Å. h, Overall pre-rotation map colored according to the local resolution estimates**

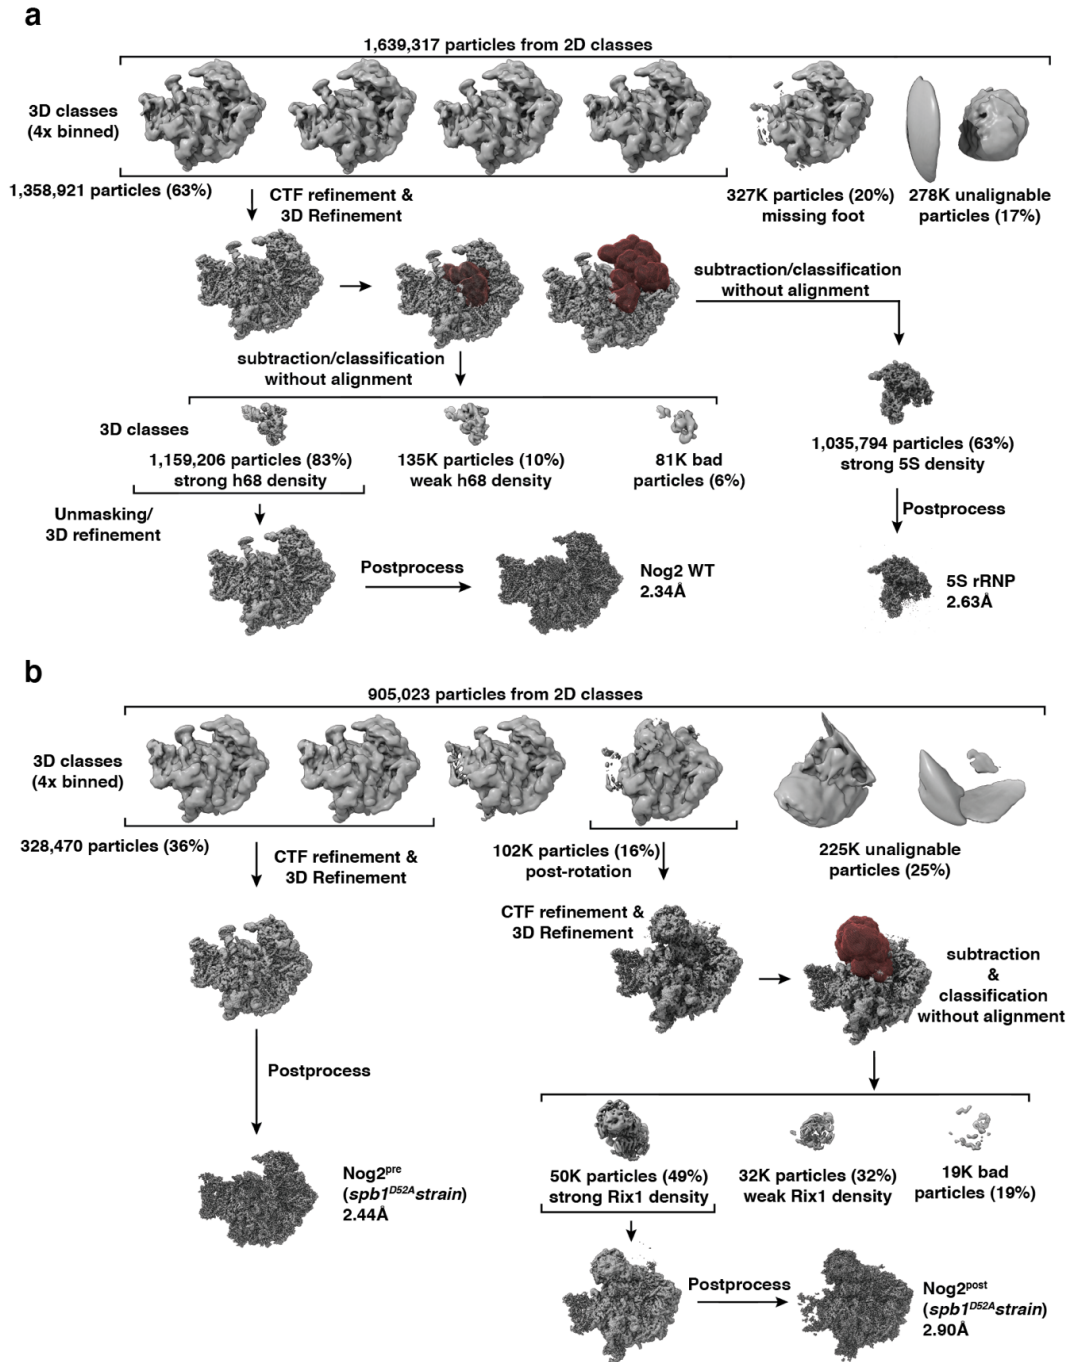

**Supplementary Information Figure 4 | Cryo-EM data processing, 3D-classification and particle sorting scheme.** **a**, Sorting and refinement scheme for Nog2<sup>pre</sup> of the wild type *SPB1* sample. **b**, Sorting and refinement scheme for Nog2<sup>pre</sup> and Nog2<sup>post</sup> of the *spb1<sup>D52A</sup>* sample. Map volumes are shown in gray, masks (dark red) used for subtraction and local classifications are shown aligned to their respective maps. Sorting and classification criteria are denoted, particle number and percentage of the total and final resolution are shown for each map.



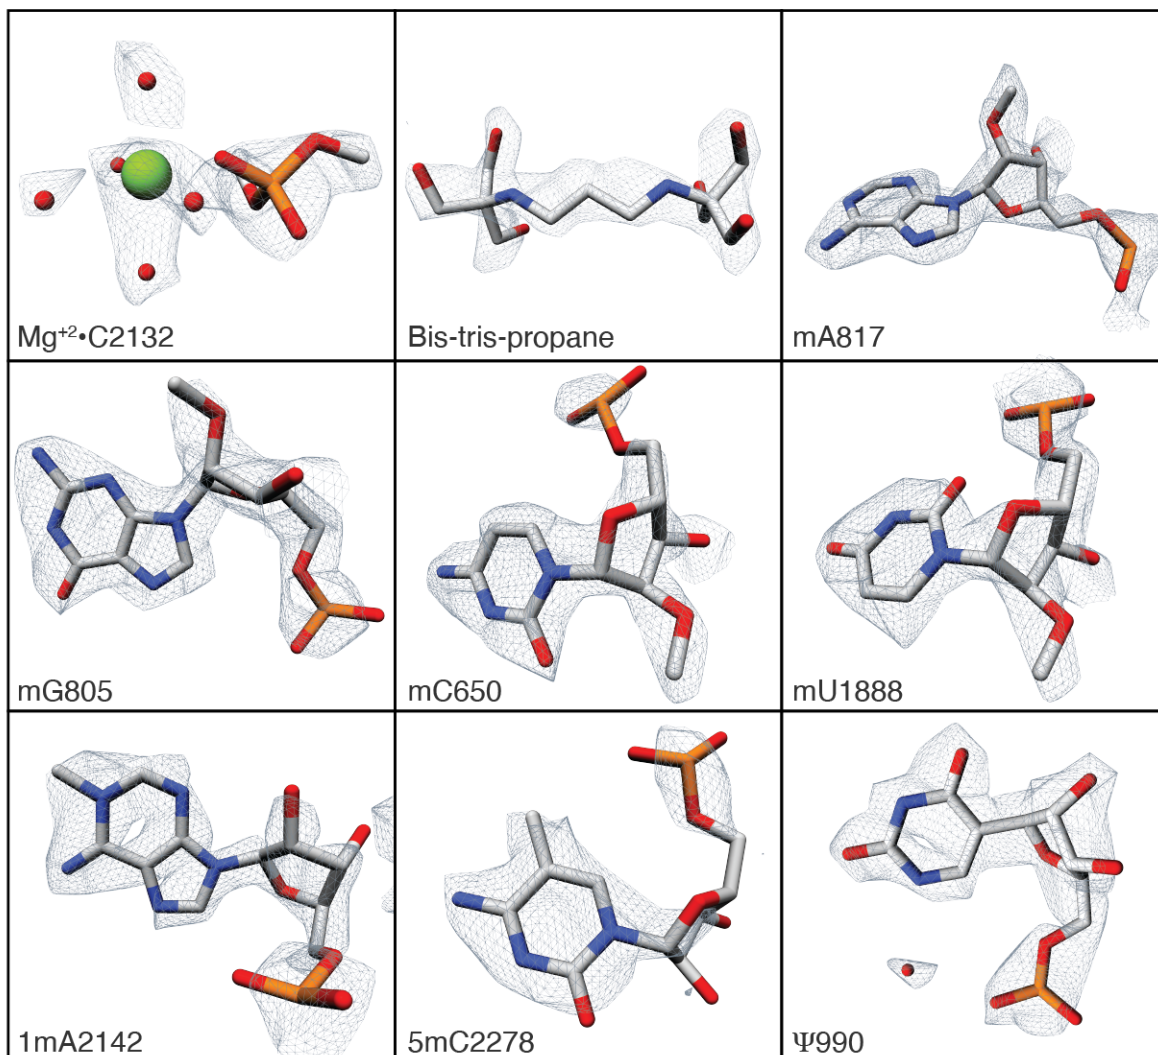

**Supplementary Information Figure 5 | Representative Cryo-EM map densities for the wild-type Nog2<sup>pre</sup> sample.** Models and surrounding map density of coordinated magnesium ions, bis-tris-propane molecules and modified nucleotides identified within the Nog2<sup>pre</sup> maps.

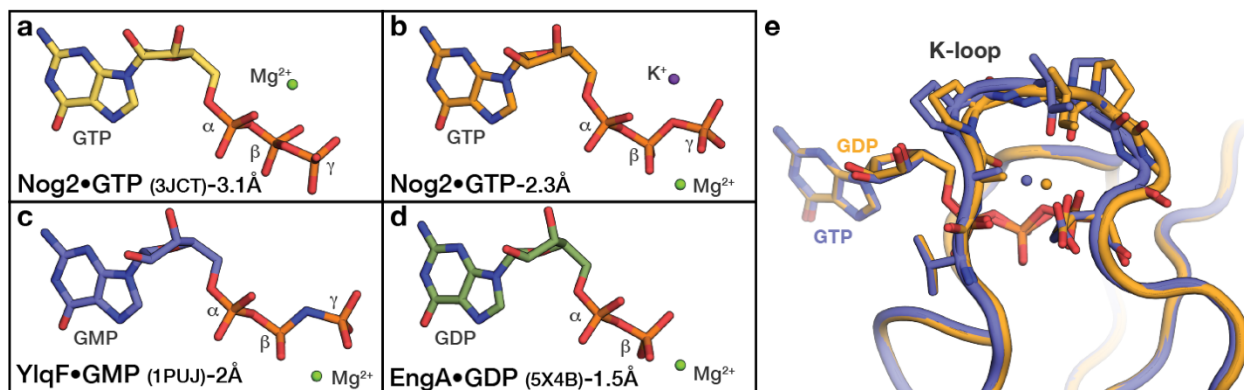

**Extended Data Figure 6 | Map interpretation.** Stick representations of nucleotides in selected K-loop GTPases. **a**, In the original *Nog2*<sup>pre</sup> structural model (PDB [3JCT](#)), the  $\gamma$ -phosphate was placed into the density of the  $Mg^{2+}$  and the  $Mg^{2+}$  ion was placed in the density of the  $K^+$  ion. **b**, Our interpretation of the nucleotide density of *Nog2* is consistent with high-resolution crystal structures (**c**, **d**) of the bacterial K-loop ATPases YlqF/RbgA (PDB [1PUJ](#)) and EngA (PDB [5X4B](#)) (**c**, **d**). **e**, Superposition of *Nog2*-GTP (blue) and *Nog2*-GDP (yellow) models shows that GTP hydrolysis causes a  $\sim 1\text{\AA}$  shift in the position of the K-loop.

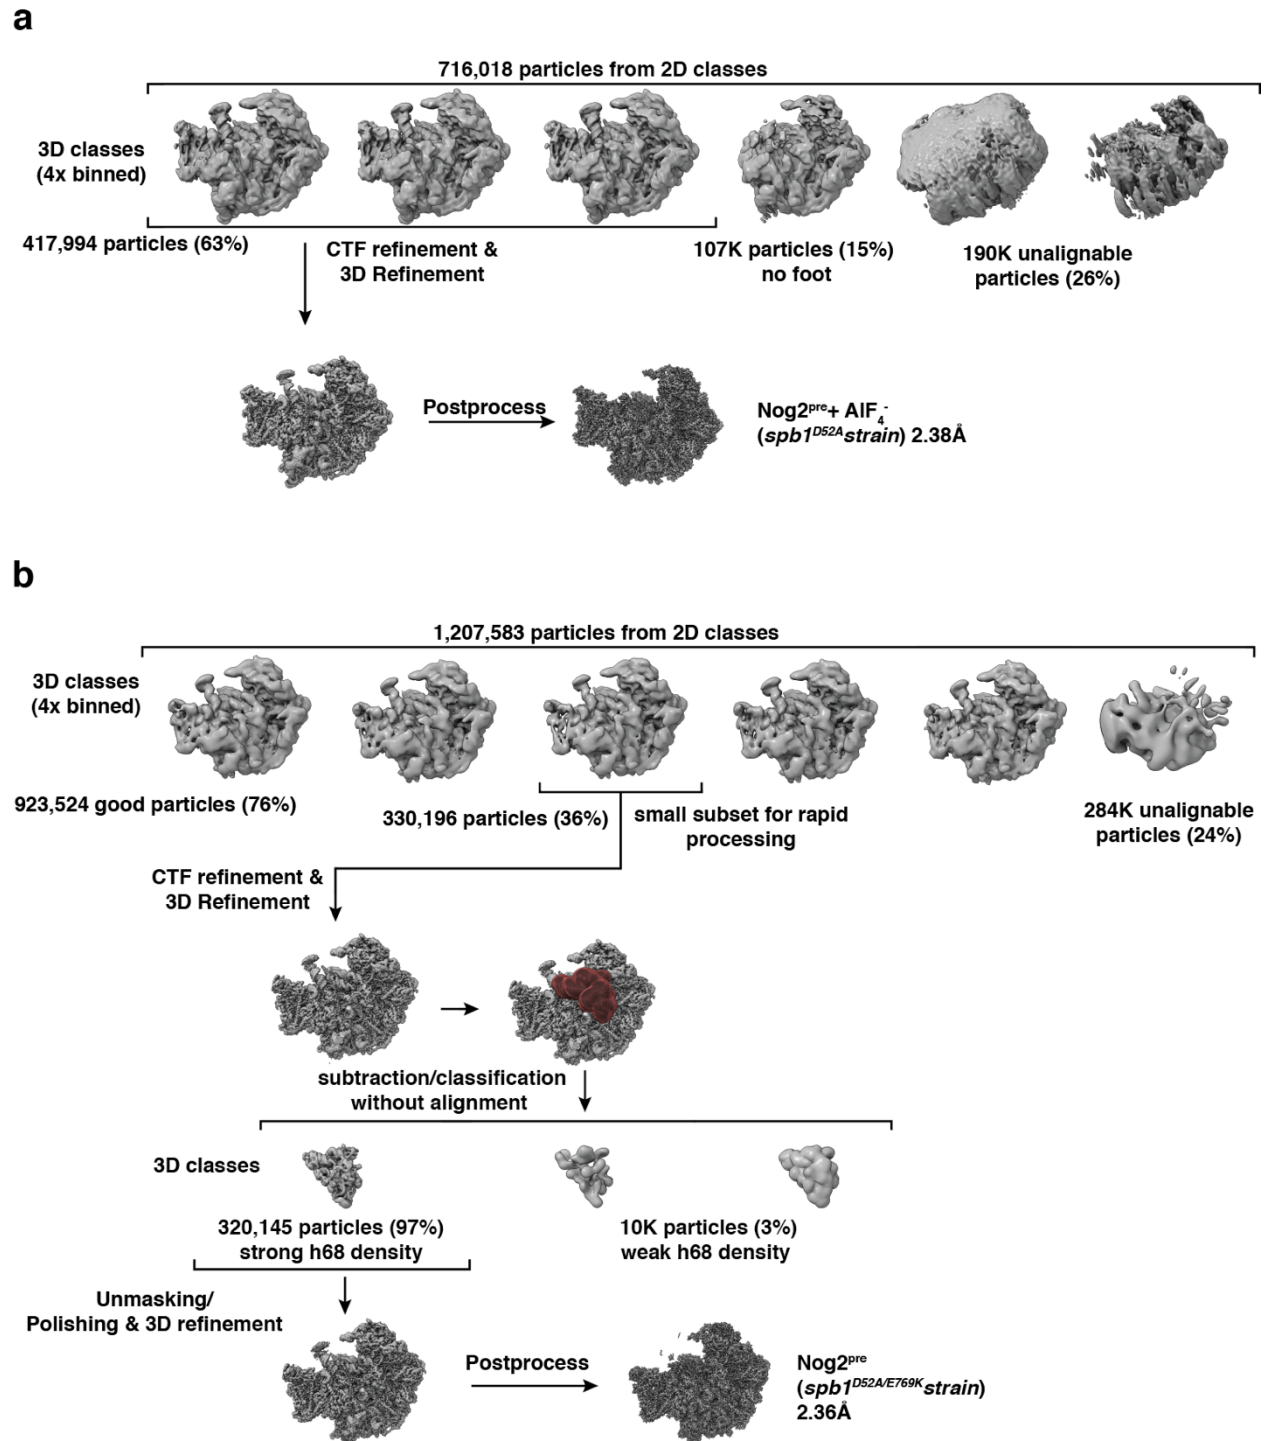

**Supplementary Information Figure 7 | Cryo-EM data processing, 3D-classification and particle sorting scheme for Nog2·Tif6 intermediates. a,** Sorting and refinement scheme for Nog2<sup>pre</sup> purified from an *spb1*<sup>D52A</sup> strain in which AIF<sub>4</sub><sup>-</sup> was added before grid preparation. **b,** Sorting and refinement scheme for Nog2<sup>pre</sup> purified from an *spb1*<sup>D52A/E769K</sup> suppressor strain. Map volumes are shown in gray, masks (dark red) used for subtraction and local classifications are shown aligned to their respective maps. Sorting and classification criteria are denoted, particle number and percentage of the total and final resolution are shown for each map.

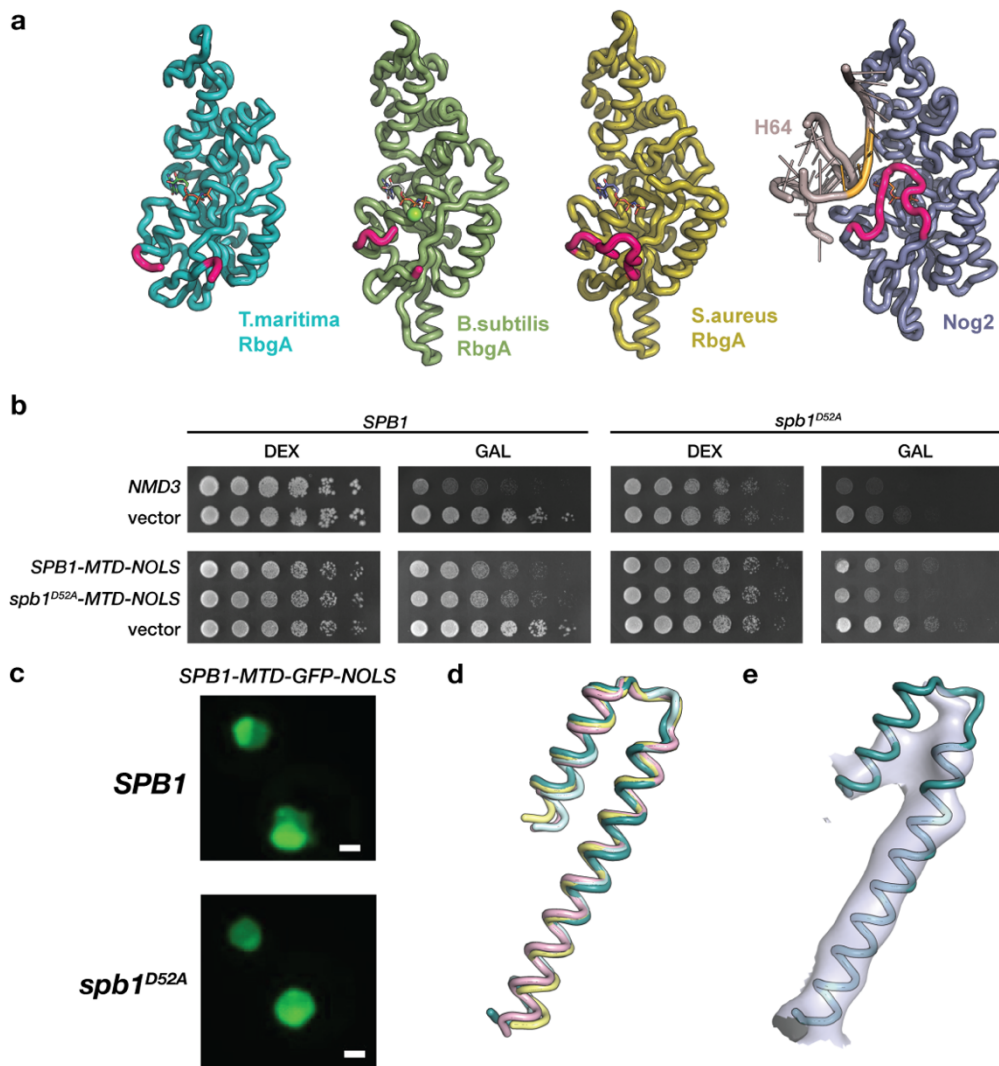

**Supplementary Information Figure 8 | Overexpression of *NMD3* or *SPB1-MTD* does not rescue growth of *spb1<sup>D52A</sup>* and location of *spb1<sup>D52A</sup>* suppressor mutants in the C-terminal domain of Spb1. **a**, Cartoon representation of isolated bacterial Nog2 homologs (PDBs [3CNI](#), [1PUJ](#), and [6G12](#)), showing that the K-loop (pink) is not present in a catalytically active conformation. When bound to the pre-60S, the K-loop of Nog2 is stabilized in its active conformation by interactions with H64 (far right). **b**, Overexpression of *NMD3* or *SPB1-MTD* does not rescue the slow growth phenotype of the *spb1<sup>D52A</sup>* strain, instead showing a mild dominant negative effect. Plasmids containing Gal-inducible *NMD3*, *SPB1-MTD*, *spb1<sup>D52A</sup>-MTD* or empty vector were transformed into the *SPB1* or *spb1<sup>D52A</sup>* strains and plated on selective synthetic media containing Glucose (DEX) or Galactose (GAL). **c**, Light microscopy of yeast cells shows the proper nucleolar localization of overexpressed *SPB1-MTD-NOLS*. Images are pseudo-colored and scale bar represents 1  $\mu$ m. **d**, Superposition of AlphaFold models from *S.cerevisiae* (teal), *S.pombe* (pink), *D.melanogaster* (yellow) and *H.sapiens* (cyan) for the helical segment of Spb1 containing the suppressor mutations. **e**, *S.cerevisiae* model docked into the cryo-EM density from the NE1 (pdb [7U0H](#)) pre-60S intermediate reconstruction<sup>11</sup>.**

## References

45. Brachmann, C.B. et al. Designer deletion strains derived from *Saccharomyces cerevisiae* S288C: a useful set of strains and plasmids for PCR-mediated gene disruption and other applications. *Yeast* **14**, 115-32 (1998).
