# Supplementary material for: rRNA methylation by Spb1 regulates the GTPase activity of Nog2 during 60S ribosomal subunit assembly
Source: PubMed Central journal article supplement (PMC9981671; doi:10.1038/s41467-023-36867-5), 2023-03-02
Supplement: 41467_2023_36867_MOESM3_ESM.pdf [file 41467_2023_36867_MOESM3_ESM.pdf]

File name: Supplementary Movie 1

Description: GTP, GDP-AIF4, GDP transitions in the active site of Nog2.
